# Supplementary material for: Near-infrared electron acceptors based on terrylene diimides for organic solar cells
Source: Royal Society of Chemistry journal article supplement (doi:10.1039/c8ta08186g), 2018-01-01

## Supporting Information for

### **Near-Infrared Electron Acceptors Based on Terrylene Diimides for Organic Solar Cells**

Ningning Liang,<sup>a</sup> Kai Sun,<sup>b</sup> Jiajing Feng,<sup>a</sup> Yu Chen,<sup>c</sup> Dong Meng,<sup>c</sup> Wei Jiang,<sup>c</sup> Yan Li,<sup>c</sup>  
Jianhui Hou,<sup>\*,c</sup> Zhaohui Wang<sup>\*,a</sup>

<sup>a</sup> Key Laboratory of Organic Optoelectronics and Molecular Engineering, Department of Chemistry,  
Tsinghua University, Beijing, 100084, P. R. China

<sup>b</sup> State Key Laboratory of PV Science and Technology, Changzhou, 213000, P. R. China.

<sup>c</sup> Institute of Chemistry, Chinese Academy of Sciences, Beijing, 100190, P. R. China

#### **Table of Contents**

|                                                                       |           |
|-----------------------------------------------------------------------|-----------|
| <b>1. Materials and Characterization Techniques.....</b>              | <b>S2</b> |
| <b>2. Characterization of TDI, ph-TDI and th-TDI.....</b>             | <b>S3</b> |
| <b>3. Devices Fabrication and Characterization.....</b>               | <b>S4</b> |
| <b>4. <sup>1</sup>H NMR, <sup>13</sup>C NMR and HRMS Spectra.....</b> | <b>S9</b> |

## 1. Materials and Characterization Techniques

$^1\text{H}$  nuclear magnetic resonance (NMR) and  $^{13}\text{C}$  NMR spectra were recorded in deuterated solvents on a Bruker AVIII 500WB NMR spectrometer. NMR chemical shifts are reported in parts per million downfield from a tetramethylsilane (TMS) reference using the residual protonated solvent as an internal standard. HR-MALDI-TOF mass spectra were determined on Bruker solariX 9.4 Tesla Fourier Transform Mass Spectrometer. Ultraviolet–visible (UV–vis) absorption spectra were measured with a Hitachi (Model U-3010) spectrophotometer in a 1-cm quartz cell. Cyclic voltammograms (CV) were recorded on a Zahner IM6e electrochemical workstation using glassy carbon discs as the working electrode, Pt wire as the counter electrode, Ag/AgCl electrode as the reference electrode at a scanning rate of 100 mV/s. 0.1 M  $\text{Bu}_4\text{NPF}_6$  (tetrabutylammoniumhexafluorophosphate) was dissolved in acetonitrile, which was calibrated by the ferrocene/ferroncenium ( $\text{Fc}/\text{Fc}^+$ ) as the redox couple. The thin films were deposited from  $\text{CHCl}_3$  solution onto the working electrode. All chemicals were purchased from commercial suppliers and used without further purification unless otherwise specified.

**TDI:**  $^1\text{H}$  NMR (500 MHz,  $\text{CDCl}_2\text{CDCl}_2$ , 373K):  $\delta$  = 8.61-8.60 (d,  $J$  = 8.0 Hz, 4H), 8.50 (s, 4H), 8.45-8.44 (d,  $J$  = 8.0 Hz, 4H), 5.22-5.16 (m, 2H), 2.29-2.24 (m, 4H), 1.98-1.92 (m, 4H), 1.42-1.33 (m, 24H), 0.90-0.87 (m, 12H);  $^{13}\text{C}$  NMR (125 MHz,  $\text{CDCl}_2\text{CDCl}_2$ , 373K):  $\delta$  = 164.15, 135.44, 131.32, 131.11, 129.82, 128.78, 126.10, 124.15, 122.58, 121.37, 54.83, 32.61, 31.74, 26.68, 22.45, 13.84; HRMS (MALDI, 100%): calcd (%) for  $\text{C}_{56}\text{H}_{58}\text{N}_2\text{O}_4$ : 822.4402; found, 822.4405.

**ph-TDI:**  $^1\text{H}$  NMR (400 MHz,  $\text{CDCl}_3$ , 298K):  $\delta$  = 8.50-8.48 (sd,  $J$  = 7.6 Hz, 4H), 7.45-7.39 (m, 16H), 7.37-7.34 (m, 8H), 5.23-5.16 (m, 2H), 2.31-2.22 (m, 4H), 1.85-1.79 (m, 4H), 1.30-1.25 (m, 24H), 0.84-0.81 (m, 12H);  $^{13}\text{C}$  NMR (100 MHz,  $\text{CDCl}_3$ , 298K):  $\delta$  = 165.04, 163.99, 143.39, 140.20, 135.72, 135.08, 133.80, 129.87, 129.43, 128.81, 127.92, 127.35, 121.29, 120.64, 54.53, 32.36, 31.76, 26.59, 22.56, 14.03; HRMS (MALDI, 100%): calcd (%) for  $\text{C}_{80}\text{H}_{74}\text{N}_2\text{O}_4$ : 1126.5654; found, 1126.5655.

**th-TDI:**  $^1\text{H}$  NMR (500 MHz,  $\text{CDCl}_2\text{CDCl}_2$ , 373K):  $\delta$  = 8.55 (s, 4H), 7.76 (s, 4H), 7.41-7.40 (d,  $J$  = 5.0 Hz, 4H), 7.19 (s, 4H), 7.13-7.11 (m, 4H), 5.18-5.13 (m, 2H), 2.26-2.22 (m, 4H), 1.90-1.86 (m, 4H), 1.39-1.31 (m, 24H), 0.88-0.85 (m, 12H);  $^{13}\text{C}$  NMR (125 MHz,  $\text{CDCl}_2\text{CDCl}_2$ , 373K):  $\delta$  = 164.02, 144.85, 135.82, 135.14, 132.76, 129.49, 129.44, 129.17, 129.07, 128.50, 128.02, 127.47, 126.96, 121.33, 54.90, 32.56, 31.72, 26.63, 22.45, 13.88; HRMS (MALDI, 100%): calcd (%) for  $\text{C}_{72}\text{H}_{66}\text{N}_2\text{O}_4\text{S}_4$ : 1150.3910; found, 1150.3917.

## 2. Characterization of TDI, ph-TDI and th-TDI

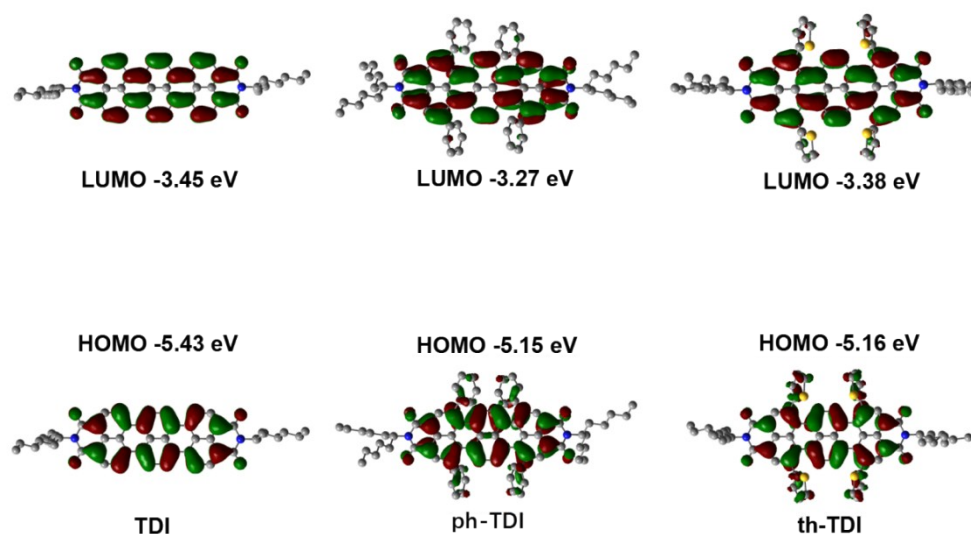

**Figure S1.** Energies and shapes of B3LYP/6-31G (d,p) frontier  $\pi$  orbitals of model TDI, ph-TDI and th-TDI.

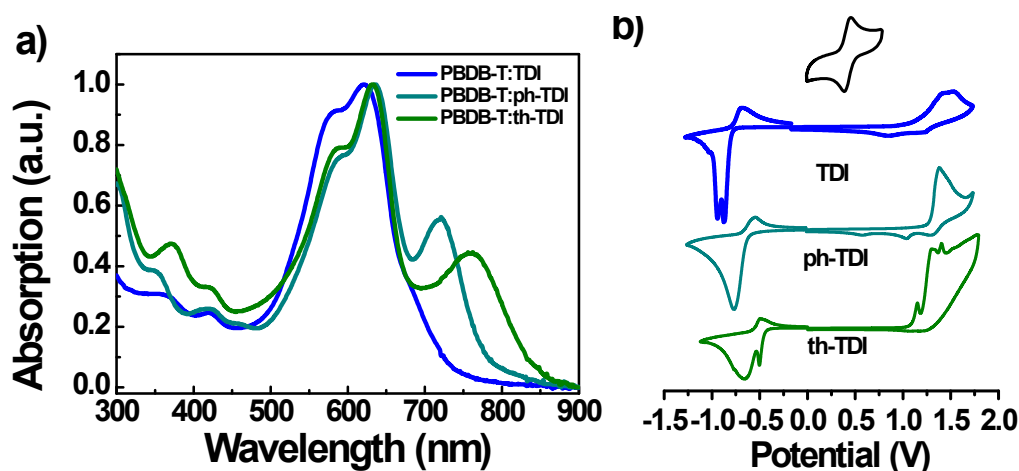

**Figure S2.** a) UV-vis normalized absorption spectra of TDI, ph-TDI and th-TDI blend films and b) CV plots of TDI, ph-TDI and th-TDI in film.

### 3. Devices Fabrication and Characterization.

OFET devices: The organic field-effect transistors were fabricated on a commercial Si/SiO<sub>2</sub>/Au substrate purchased from First MEMS Co. Ltd. A heavily N-doped Si wafer with a SiO<sub>2</sub> layer of 300 nm served as the gate electrode and dielectric layer, respectively. The source-drain electrodes of Ti (2 nm)/Au (28 nm) were sputtered and patterned by a lift-off technique. The gate dielectrics were treated with octadecyltrichlorosilane (ODTS) in a vacuum oven at 120 °C. The treated substrates were treated with hexane, chloroform and isopropyl alcohol. Before spin-coating the solution of TDIs, the sample was dissolved into the chloroform with 10% n-hexane. Then the solution was spin-coated onto the substrates with the thickness of 30-50 nm and thermally annealed at 200 °C for 10 min in a glovebox filled with N<sub>2</sub>. The mobilities were calculated from the saturation region with the following equation:  $I_{DS} = (W/2L)C_i\mu(V_G - V_T)^2$ , where  $I_{DS}$  is the drain-source current, W is the channel width (1400 μm), L is the channel length (50 μm),  $\mu$  is the field-effect mobility,  $C_i$  is the capacitance per unit area of the gate dielectric layer,  $V_G$  and  $V_T$  are the gate voltage and threshold voltage, respectively.

**Table S1. The p-channel and n-channel characteristics of ambipolar OFETs based on TDI, ph-TDI and th-TDI with  $V_{SD} = 100$  V and -100 V.**

| Sample |         | Mobility<br>(cm <sup>2</sup> V <sup>-1</sup> s <sup>-1</sup> ) | $V_T$<br>(V) | $I_{on}/I_{off}$ |
|--------|---------|----------------------------------------------------------------|--------------|------------------|
| TDI    | $\mu_h$ | $1.5 \times 10^{-4}$                                           | -43.5        | $1 \times 10^1$  |
|        | $\mu_e$ | $7.3 \times 10^{-3}$                                           | 15.5         | $1 \times 10^3$  |
| ph-TDI | $\mu_h$ | $2.3 \times 10^{-2}$                                           | -57.3        | $4 \times 10^1$  |
|        | $\mu_e$ | $2.8 \times 10^{-2}$                                           | 9.3          | $2 \times 10^2$  |
| Th-TDI | $\mu_h$ | $5.5 \times 10^{-3}$                                           | -54.0        | $1 \times 10^1$  |
|        | $\mu_e$ | $1.2 \times 10^{-2}$                                           | 5.0          | $1 \times 10^2$  |

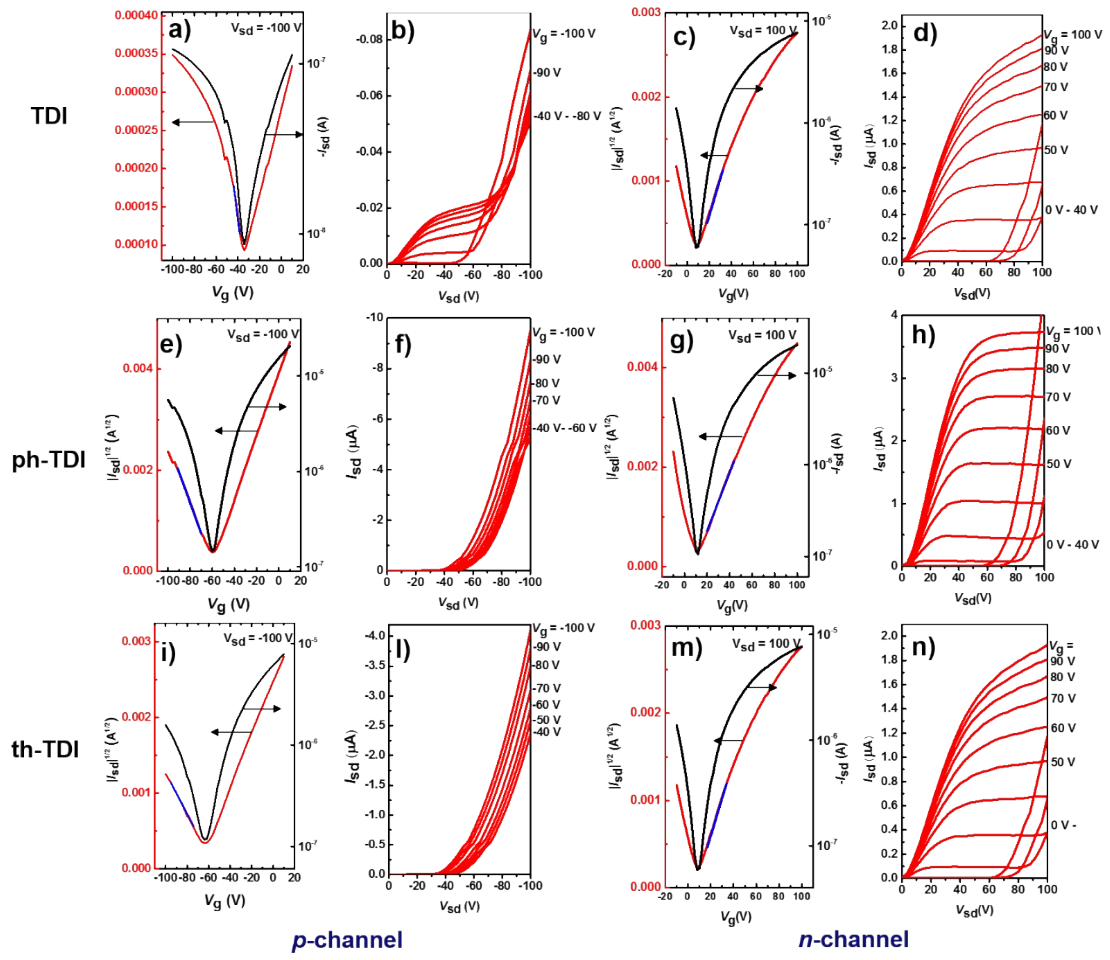

**Figure S3.** Current-voltage ( $J$ - $V$ ) characteristics of OFETs based on TDI, ph-TDI and th-TDI with optimized thin-film fabricated by CF+10%  $n$ -Hexane annealed at 200 °C. (a), (e), (i) Transfer characteristics of  $p$ -channel for films with  $V_{SD}=-100$  V; (c), (g), (m) Transfer characteristics of  $n$ -channel for films with  $V_{SD}=100$  V; (b), (f), (l) Output characteristics of  $p$ -channel for films; (d), (h), (n) Output characteristics of  $n$ -channel for films ( $L=1400$   $\mu\text{m}$  and  $W= 50$   $\mu\text{m}$ )

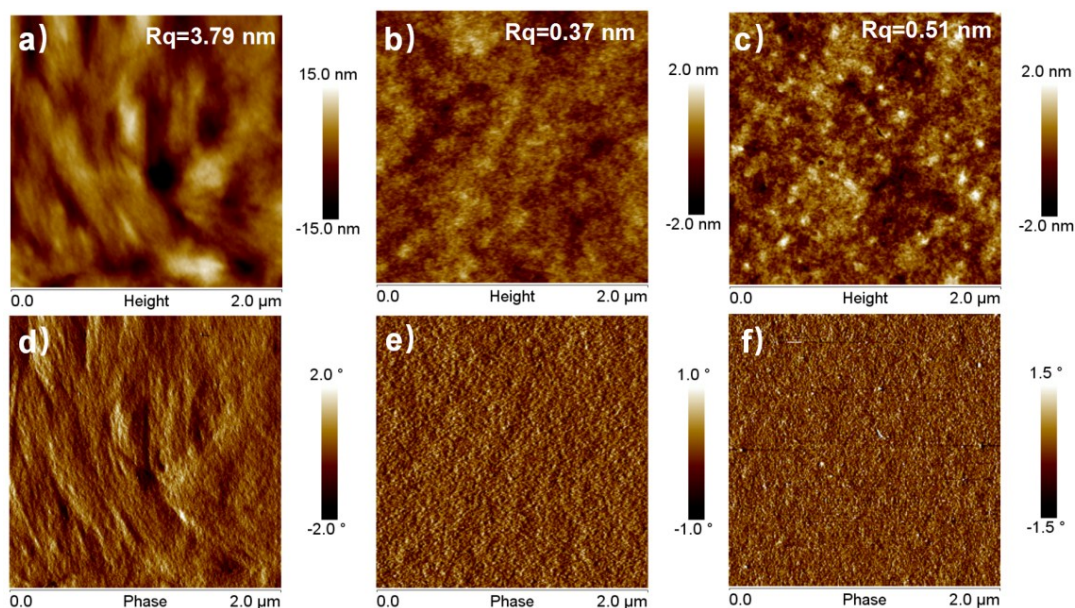

**Figure S4.** a-c) AFM height images, d-f) AFM phase images of TDI film, ph-TDI film and th-TDI film, respectively.

Photovoltaic devices: In an ultrasonic bath, the ITO-coated glass ( $15 \Omega/\square$ ) was cleaned with deionized water, acetone, and isopropanol, respectively. After oxygen plasma cleaning for 20 min, a 40 nm thick ZnO cathode buffer layer was spin-cast onto the ITO substrate and then dried by baking in an oven at 200 °C for 60 min. Of which, the polymeric donor PBDB-T ( $M_n=22923$  g/mol,  $M_w=54445$  g/mol,  $D=2.375$ ) was selected as the donor material. The active layer were then deposited on top of the ZnO layer by spin-coating from CB or *o*-xylene solution (8 mg/mL of polymers) of PBDB-T:acceptor and different concentration of 1-CN as a processing additive was added to the solutions before use. The active layers solution using CB as the host solvent was stirred at the room temperature and the solution in *o*-xylene was stirred at 70 °C for at least 8 hours. Then, the active layer solution was spin-coated onto the ZnO buffer layer at the speed of 2000 rpm for 80-nm-thick active layers. Then the device fabrication process was completed by thermally evaporating 10-nm-thick MoO<sub>3</sub> as the anode buffer layer under vacuum at a pressure of  $3 \times 10^{-4}$  Pa. Finally, 100-nm-thick Al layer was evaporated on top of the active layer. The overlapping area between the cathode and anode defined a pixel size of 0.04 cm<sup>2</sup>. The  $J-V$  measurement was performed via the solar simulator (SS-F5-3A, Enlitech) along with AM 1.5G spectra whose intensity was calibrated by the certified standard silicon solar cell (SRC-2020, Enlitech) at 100 mw/cm<sup>2</sup>. The EQE data were obtained using a solar cell spectral

response measurement system (QE-R3011, Enli Technology Co. Ltd). The film thickness data were obtained employing a surface profilometer (Dektak XT, Bruker).

**Table S2. Photovoltaic parameters of the cells using CB as the host solvent under AM 1.5G illumination of 100 mW/cm<sup>2</sup>**

| Blend                | Ratio(w/w) | Solvent | $V_{OC}$ (V) | $J_{SC}$ (mA cm <sup>-2</sup> ) | FF   | PCE(%) |
|----------------------|------------|---------|--------------|---------------------------------|------|--------|
| <b>PBDB-T:TDI</b>    | 1.5:1      | w/o     | 0.747        | 3.36                            | 0.37 | 0.93   |
|                      | 1:1        | w/o     | 0.750        | 4.93                            | 0.44 | 1.62   |
|                      | 1:1        | 1% CN   | 0.726        | 2.03                            | 0.33 | 0.49   |
|                      | 1:1.5      | w/o     | 0.745        | 4.65                            | 0.44 | 1.52   |
| <b>PBDB-T:ph-TDI</b> | 1:1        | w/o     | 0.923        | 8.91                            | 0.41 | 3.36   |
|                      | 1:1        | 0.5% CN | 0.930        | 9.78                            | 0.48 | 4.40   |
|                      | 1:1        | 1% CN   | 0.934        | 9.64                            | 0.49 | 4.43   |
|                      | 1:1        | 2% CN   | 0.930        | 9.73                            | 0.48 | 4.23   |
| <b>PBDB-T:th-TDI</b> | 1:1        | w/o     | 0.825        | 9.01                            | 0.42 | 3.15   |
|                      | 1:1        | 1% CN   | 0.823        | 9.13                            | 0.47 | 3.50   |

**Table S3. Photovoltaic parameters of the cells using o-xylene as the host solvent under AM 1.5G illumination of 100 mW/cm<sup>2</sup>**

| Blend                | Solvent | $V_{OC}$ (V) | $J_{SC}$ (mA cm <sup>-2</sup> ) | FF   | PCE (%) |
|----------------------|---------|--------------|---------------------------------|------|---------|
| <b>PBDB-T:TDI</b>    | w/o     | 0.735        | 4.41                            | 0.35 | 1.13    |
|                      | 3% CN   | 0.787        | 4.14                            | 0.44 | 1.44    |
| <b>PBDB-T:ph-TDI</b> | w/o     | 0.892        | 8.11                            | 0.38 | 2.74    |
|                      | 1% CN   | 0.912        | 9.70                            | 0.45 | 4.00    |
|                      | 2% CN   | 0.925        | 9.79                            | 0.51 | 4.64    |
|                      | 3% CN   | 0.938        | 11.10                           | 0.49 | 5.10    |
|                      | 4% CN   | 0.930        | 9.04                            | 0.51 | 4.33    |
|                      |         |              |                                 |      |         |
| <b>PBDB-T:th-TDI</b> | w/o     | 0.789        | 8.11                            | 0.39 | 2.47    |
|                      | 1% CN   | 0.811        | 9.58                            | 0.46 | 3.55    |
|                      | 2% CN   | 0.817        | 9.95                            | 0.49 | 3.96    |
|                      | 3% CN   | 0.840        | 10.46                           | 0.47 | 4.12    |
|                      | 4% CN   | 0.828        | 9.23                            | 0.50 | 3.86    |

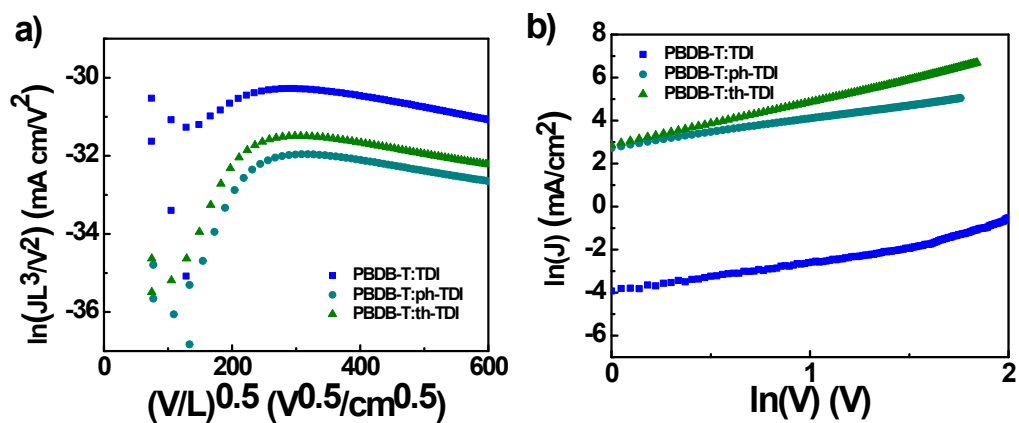

**Figure S5.** a) Plots of  $\ln(JL^3/V^2)$  VS  $\ln(V/L)^{0.5}$  obtained from the hole-only devices and b) plots of  $\ln J$  vs  $\ln V$  obtained from the electron-only devices for the optimized solar cells based on PBDB-T:TDI, PBDB-T:ph-TDI and PBDB-T:th-TDI active layers.

**Table S4. Hole and electron mobilities of TDI, ph-TDI and th-TDI blend films processed by *o*-xylene and 1-CN solvent.**

| Blend         | Hole mobility<br>(cm <sup>2</sup> /(V s)) | Electron mobility<br>(cm <sup>2</sup> /(V s)) | $\mu_h/\mu_e$ |
|---------------|-------------------------------------------|-----------------------------------------------|---------------|
| PBDB-T:TDI    | 6.93*10 <sup>-4</sup>                     | 3.97*10 <sup>-8</sup>                         | 17204         |
| PBDB-T:ph-TDI | 1.27*10 <sup>-4</sup>                     | 2.48*10 <sup>-5</sup>                         | 5.12          |
| PBDB-T:th-TDI | 2.02*10 <sup>-4</sup>                     | 3.29*10 <sup>-5</sup>                         | 6.14          |



#### 4. $^1\text{H}$ NMR, $^{13}\text{C}$ NMR and HRMS Spectra

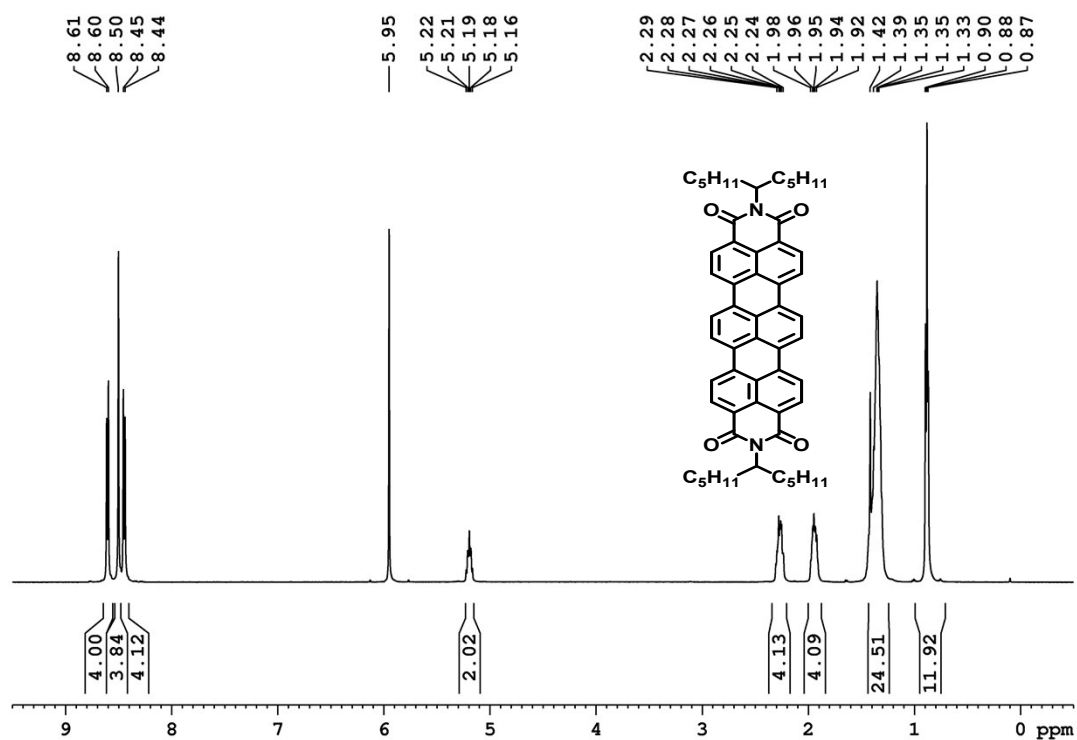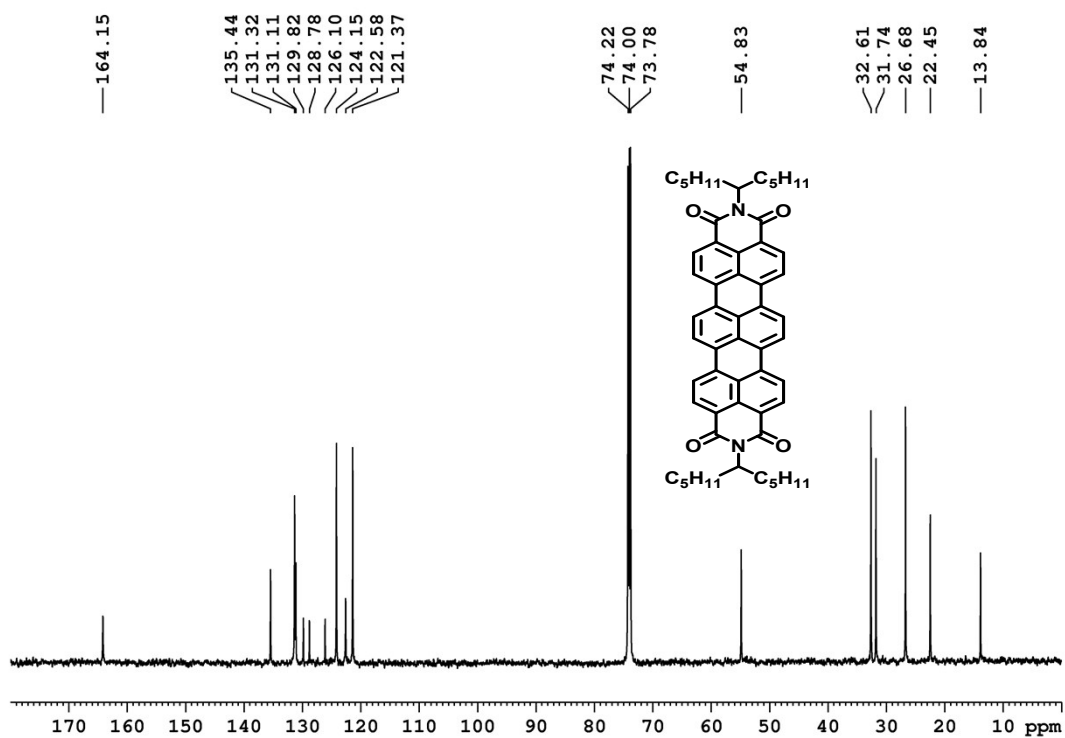

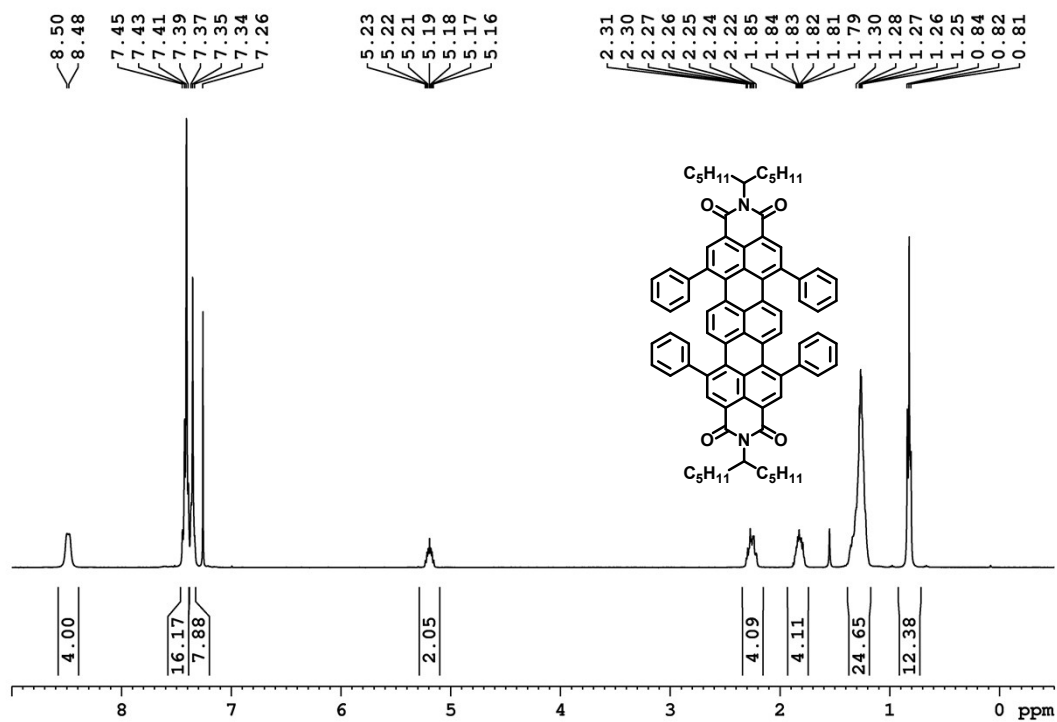

Supplement: c8ta08186g1.pdf [file c8ta08186g1.pdf]
